# Supplementary material
Source: Springer Nature journal article supplement (https://www.springermedizin.de/resource/supplementary/13063_2010_643_MOESM2_ESM.pdf/9618384)

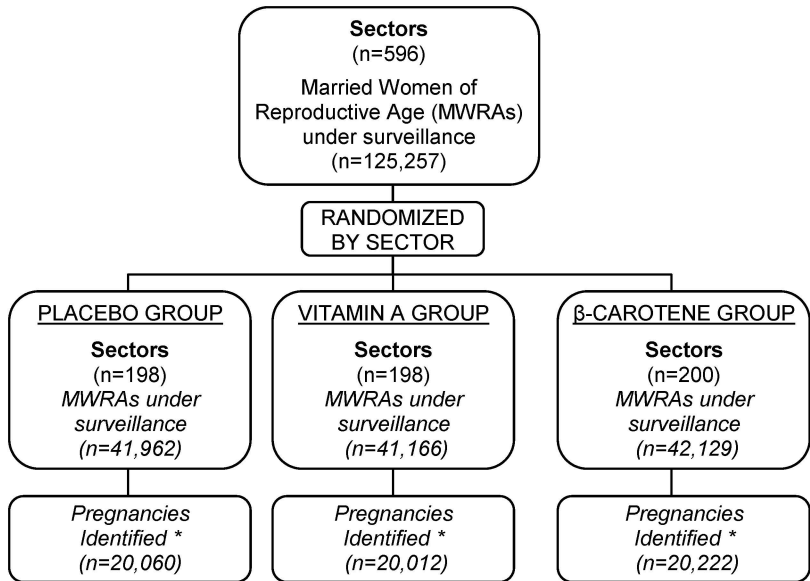

\* Pregnancies ascertained and eligible to be in the trial cohort.

Supplement: MOESM2 [file 9618384]
